# Supplementary material
Source: PubMed Central journal article supplement (PMC5842434)
Supplement: NIHMS923085-supplement-ANS_Table_S1.pdf [file NIHMS923085-supplement-ANS_Table_S1.pdf]

Table S1. Outcomes of infants by level of exposure to antenatal corticosteroids (ANS)

|                                                                                                            | Complete ANS     |                                 | Partial ANS      |                                   | No ANS          | Complete v Partial              |
|------------------------------------------------------------------------------------------------------------|------------------|---------------------------------|------------------|-----------------------------------|-----------------|---------------------------------|
|                                                                                                            | n/total n (%)    | ARR (95% CI) <sup>a</sup>       | n/total n (%)    | ARR (95% CI)                      | n/total n (%)   | ARR (95% CI)                    |
| Total study population                                                                                     | N=7136           |                                 | N=2533           |                                   | N=1307          |                                 |
| Death                                                                                                      |                  |                                 |                  |                                   |                 |                                 |
| By 36 wk' postmenstrual age                                                                                | 1352/7119 (19.0) | 0.62 (0.57-0.68) <sup>b</sup>   | 591/2527 (23.4)  | 0.75 (0.68 – 0.83) <sup>b</sup>   | 513/1305 (39.3) | 0.82 (0.76-0.90) <sup>b</sup>   |
| Before discharge                                                                                           | 1529/7104 (21.5) | 0.66 (0.61-0.72) <sup>b</sup>   | 654/2520 (26.0)  | 0.77 (0.70 – 0.85) <sup>b</sup>   | 540/1302 (41.5) | 0.85 (0.78-0.92) <sup>b</sup>   |
| Due to bronchopulmonary dysplasia                                                                          | 138/7098 (1.9)   | 1.88 (1.08-3.27) <sup>b,c</sup> | 33/2518 (1.3)    | 1.12 (0.59-2.11) <sup>c</sup>     | 16/1299 (1.2)   | 1.52 (1.03-2.25) <sup>b,c</sup> |
| Due to respiratory distress syndrome                                                                       | 475/7098 (6.7)   | 0.66 (0.55-0.80) <sup>b</sup>   | 222/2518 (8.8)   | 0.81 (0.66 – 0.99) <sup>b,c</sup> | 171/1299 (13.2) | 0.80 (0.68-0.94) <sup>b,c</sup> |
| Bronchopulmonary dysplasia (physiologic definition) or death by 36 wk' postmenstrual age                   | 4382/7034 (62.3) | 0.92 (0.89-0.96) <sup>b</sup>   | 1614/2504 (64.5) | 0.97 (0.92 – 1.01)                | 940/1300 (72.3) | 0.97 (0.94-1.01)                |
| Population of survivors                                                                                    | N=5575           |                                 | N=1866           |                                   | N=762           |                                 |
| Bronchopulmonary dysplasia, physiologic definition                                                         | 2847/5485 (51.9) | 0.95 (0.88-1.02)                | 953/1843 (51.7)  | 0.98 (0.90 – 1.06)                | 396/755 (52.5)  | 0.999 (0.95-1.05)               |
| Bronchopulmonary dysplasia, by use of supplemental oxygen at 36 wk' postmenstrual age, clinical definition | 2982/5545 (53.8) | 0.94 (0.88-1.01)                | 1008/1853 (54.4) | 0.98 (0.91 – 1.06)                | 415/759 (54.7)  | 0.98 (0.93-1.02)                |
| Respiratory distress syndrome                                                                              | 5478/5575 (98.3) | 0.99 (0.99-0.998) <sup>b</sup>  | 1853/1866 (99.3) | 1.00 (0.99-1.01)                  | 760/762 (99.7)  | 0.99 (0.98-0.99) <sup>b</sup>   |
| Surfactant use                                                                                             | 4651/5575 (83.4) | 0.90 (0.87-0.92) <sup>b</sup>   | 1665/1866 (89.2) | 0.97 (0.94 – 0.99) <sup>b</sup>   | 702/762 (92.1)  | 0.93 (0.92-0.95) <sup>b</sup>   |
| Mechanical ventilation                                                                                     | 4973/5571 (89.3) | 0.94 (0.92-0.96) <sup>b</sup>   | 1737/1865 (93.4) | 0.98 (0.96 – 1.00)                | 723/762 (94.9)  | 0.96 (0.94-0.97) <sup>b</sup>   |
| Pneumothorax                                                                                               | 256/5575 (4.6)   | 0.74 (0.53-1.04) <sup>c</sup>   | 98/1866 (5.3)    | 0.88 (0.60 – 1.27) <sup>c</sup>   | 45/762 (5.9)    | 0.84 (0.66-1.07) <sup>c</sup>   |
| Pulmonary hemorrhage                                                                                       | 203/5575 (3.6)   | 0.68 (0.49-0.94) <sup>b,c</sup> | 101/1866 (5.4)   | 0.95 (0.67 – 1.36) <sup>c</sup>   | 47/762 (6.2)    | 0.73 (0.57-0.93) <sup>b,c</sup> |
| Treatment with post-natal steroids for bronchopulmonary dysplasia                                          | 893/5420 (16.5)  | 0.97 (0.80-1.17)                | 320/1813 (17.7)  | 1.05 (0.86 – 1.28)                | 112/733 (15.3)  | 0.88 (0.78-0.98) <sup>b,c</sup> |
| Early onset sepsis                                                                                         | 99/5575 (1.8)    | 0.61 (0.36-1.04) <sup>c</sup>   | 35/1866 (1.9)    | 0.82 (0.46-1.45) <sup>c</sup>     | 17/762 (2.2)    | 0.73 (0.49-1.10) <sup>c</sup>   |
| Necrotizing enterocolitis ≥ stage 2                                                                        | 472/5575 (8.5)   | 0.96 (0.75-1.24) <sup>c</sup>   | 193/1865 (10.3)  | 1.10 (0.84-1.44) <sup>c</sup>     | 71/762 (9.3)    | 0.86 (0.72-1.03) <sup>c</sup>   |
| Intracranial hemorrhage/periventricular leukomalacia                                                       | 664/5549 (12.0)  | 0.56 (0.48-0.66) <sup>b,c</sup> | 360/1860 (19.4)  | 0.88 (0.74-1.04) <sup>c</sup>     | 167/761 (21.9)  | 0.63 (0.56-0.71) <sup>b,c</sup> |
| Patent ductus arteriosus treated with indomethacin/ibuprofen                                               | 1743/5570 (31.3) | 0.90 (0.81-0.99) <sup>b</sup>   | 697/1865 (37.4)  | 1.04 (0.93 – 1.16)                | 293/761 (38.5)  | 0.90 (0.84-0.96) <sup>b</sup>   |
| Retinopathy of prematurity ≥ stage 3 or treated with ablation/anti-VEGF drug                               | 932/5483 (17.0)  | 0.71 (0.61-0.82) <sup>b,c</sup> | 388/1827 (21.2)  | 0.87 (0.74 – 1.02) <sup>c</sup>   | 178/753 (23.6)  | 0.82 (0.74-0.91) <sup>b,c</sup> |
| Respiratory support at discharge, oxygen                                                                   | 1778/5365 (33.1) | 1.17 (1.03-1.33) <sup>b,c</sup> | 605/1818 (33.3)  | 1.20 (1.05 – 1.38) <sup>b,c</sup> | 195/740 (26.4)  | 0.98 (0.90-1.06) <sup>c</sup>   |
| Prolonged hospital stay ≥ 120 d, all causes                                                                | 1526/5442 (28.0) | 0.86 (0.77-0.95) <sup>b,c</sup> | 554/1839 (30.1)  | 1.00 (0.88 – 1.13)                | 235/752 (31.3)  | 0.92 (0.85-0.99) <sup>b</sup>   |
| Population of survivors eligible for follow-up                                                             | N=2981           |                                 | N=1145           |                                   | N=471           |                                 |
| Respiratory support at 18-22 mo corrected age, ventilation/CPAP                                            | 49/2682 (1.8)    | 0.94 (0.41-2.14) <sup>c</sup>   | 18/1045 (1.7)    | 1.11 (0.46-2.69) <sup>d</sup>     | 7/422 (1.7)     | 0.93 (0.51-1.69) <sup>c</sup>   |
| Oxygen at 18-22 mo corrected age                                                                           | 141/2682 (5.3)   | 0.99 (0.62-1.57) <sup>c</sup>   | 60/1045 (5.7)    | 1.24 (0.77 – 2.00) <sup>c</sup>   | 20/422 (4.7)    | 0.80 (0.58-1.11) <sup>c,e</sup> |

ANS, antenatal corticosteroid; ARR, adjusted relative risk; CI, confidence interval; CPAP, continuous positive airway pressure; VEGF, vascular endothelial growth factor.

<sup>a</sup> ARR and 95% CI are estimated with no ANS (not exposed to ANS) group used as referent category except for complete vs partial column where adjusted odds ratios and 95% CI are expressed for complete course of ANS compared to partial course of ANS-models adjust for birthweight, sex, multiple births, small for gestational age, maternal variables (age, marital status, race, diabetes, rupture of membranes >24 h, antepartum hemorrhage, and mode of delivery), center, and epoch; <sup>b</sup> Significant with P value <.05; <sup>c</sup> Does not adjust for center-model did not converge with center included; <sup>d</sup> Model does not adjust for center or diabetes-model did not converge with either variable included; <sup>e</sup> Significant interaction from separate models that also included ANS-epoch.
