# Supplementary material
Source: PubMed Central journal article supplement (PMC5842434)
Supplement: NIHMS923085-supplement-ANS_Table_S2.pdf [file NIHMS923085-supplement-ANS_Table_S2.pdf]

Table S2. Death before discharge of infants 22-28 weeks' gestation by antenatal corticosteroid treatment

| Gestational age | Any ANS         | No ANS         | ARR (95% CI) <sup>a</sup>         |
|-----------------|-----------------|----------------|-----------------------------------|
|                 | N=9827          | N=2028         |                                   |
|                 | n/total n (%)   | n/total n (%)  |                                   |
| 22 wk           | 80/106 (75.5)   | 519/536 (96.8) | 0.79 (0.70 – 0.90) <sup>b,c</sup> |
| 23 wk           | 494/904 (54.6)  | 438/519 (84.4) | 0.68 (0.63 – 0.74) <sup>b,c</sup> |
| 24 wk           | 696/1947 (35.7) | 134/236 (56.8) | 0.58 (0.50 – 0.66) <sup>b,c</sup> |
| 25 wk           | 496/2183 (22.7) | 78/260 (30.0)  | 0.78 (0.61 – 1.00)                |
| 26 wk           | 294/2011 (14.6) | 55/251 (21.9)  | 0.60 (0.45 – 0.79) <sup>b,c</sup> |
| 27 wk           | 189/1644 (11.5) | 29/134 (21.6)  | 0.59 (0.40 – 0.89) <sup>b,c</sup> |
| 28 wk           | 101/1032 (9.8)  | 13/92 (14.1)   | 0.69 (0.39 – 1.22) <sup>c</sup>   |

Includes data on 883 infants who died within 12 h without receiving delivery room resuscitation.

ANS, antenatal corticosteroid; ARR, adjusted relative risk; CI, confidence interval.

<sup>a</sup> ARR and 95% CI are estimated with no ANS (not exposed to ANS) group used as referent category-models adjust for birthweight, sex, multiple births, small for gestational age, maternal variables (age, marital status, race, diabetes, rupture of membranes >24 h, antepartum hemorrhage, and mode of delivery), center, and epoch; <sup>b</sup> Significant with P value <.05; <sup>c</sup> Model does not adjust for center-model did not converge with center included.
