# Supplementary material
Source: PubMed Central journal article supplement (PMC5842434)
Supplement: NIHMS923085-supplement-ANS_Table_S3.pdf [file NIHMS923085-supplement-ANS_Table_S3.pdf]

Table S3. Robust Poisson regression analysis without and with multiple imputation for selected outcomes with missing data >1% or with an imbalance of missing data > 0.3% between groups.

| Outcome                                                                                        | Without imputation<br>ARR (95% CI) | With imputation<br>ARR (95% CI) |
|------------------------------------------------------------------------------------------------|------------------------------------|---------------------------------|
| Bronchopulmonary dysplasia (physiologic definition) or death by 36 wk' postmenstrual age       | 0.94 (0.91-0.98)                   | 0.95 (0.91-0.98)                |
| Population of survivors                                                                        |                                    |                                 |
| Bronchopulmonary dysplasia, physiologic definition                                             | 0.96 (0.89-1.03)                   | 0.97 (0.90-1.03)                |
| Treatment with post-natal steroids for bronchopulmonary dysplasia                              | 0.98 (0.82-1.18)                   | 0.96 (0.79-1.13)                |
| Retinopathy of prematurity $\geq$ stage 3 or treated with ablation/anti-VEGF drug <sup>a</sup> | 0.76 (0.66-0.87)                   | 0.77 (0.66-0.87)                |
| Respiratory support at discharge, oxygen <sup>a</sup>                                          | 1.17 (1.03-1.33)                   | 1.20 (1.05-1.35)                |
| Prolonged hospital stay $\geq$ 120 d, all causes                                               | 0.94 (0.84-1.05)                   | 0.95 (0.85-1.05)                |
| Population of survivors eligible for follow-up                                                 |                                    |                                 |
| Respiratory support at 18-22 mo corrected age, ventilation/CPAP <sup>a</sup>                   | 0.91 (0.42-1.99)                   | 1.03 (0.21-1.86)                |
| Oxygen at 18-22 mo corrected age <sup>a</sup>                                                  | 1.01 (0.65-1.58)                   | 1.07 (0.60-1.54)                |

ARR and 95% CI are estimated with no antenatal corticosteroids (not exposed to antenatal corticosteroids) group used as referent category-models adjust for birthweight, sex, multiple births, small for gestational age, maternal variables (age, marital status, race, diabetes, rupture of membranes  $\geq$  24 h, antepartum hemorrhage, and mode of delivery), center, and epoch.

ARR, adjusted relative risk; CI, confidence interval; CPAP, continuous positive airway pressure; VEGF, vascular endothelial growth factor.

<sup>a</sup> Model does not adjust for center-model did not converge with center included.
